# Supplementary material for: Deep reconstruction of a Mo-based electrocatalyst for high-performance water/seawater oxidation at ampere-level current density
Source: Royal Society of Chemistry journal article supplement (doi:10.1039/d4ee04941a), 2025-01-01
Supplement: d4ee04941a1.pdf [file d4ee04941a1.pdf]

## Supporting Information

*for*

### **Deep reconstruction of Mo-based electrocatalyst for high-performance water/seawater oxidation at ampere-level current density**

*Jianpeng Sun<sup>a,b</sup>, Shuai Zhou<sup>b,c</sup>, Zhan Zhao<sup>a</sup>, Shiyu Qin<sup>a</sup>, Xiangchao Meng<sup>a\*</sup>, Chen-Ho Tung<sup>b,c</sup> and Li-Zhu Wu<sup>b,c\*</sup>*

<sup>a</sup>Key Laboratory of Marine Chemistry Theory and Technology (Ministry of Education), College of Chemistry & Chemical Engineering, Ocean University of China, Qingdao, Shandong, 266100, China.

<sup>b</sup>Key Laboratory of Photochemical Conversion and Optoelectronic Materials, New Cornerstone Science Laboratory, Technical Institute of Physics and Chemistry, Chinese Academy of Science, Beijing, 100190, China

<sup>c</sup>School of Future Technology, University of Chinese Academy of Sciences, Beijing, 100049, China

## **Experimental section**

### **Preparation of FeMoO<sub>2</sub>/NF**

FeMoO<sub>2</sub>/NF was synthesised by a method similar to that of MoO<sub>2</sub>/NF, except that the addition of 100 mg of Fe(NO<sub>3</sub>)<sub>3</sub>·9H<sub>2</sub>O to the precursor synthesis.

### **Preparation of s-FeMoOOH/NF**

A typical three-electrode system were used to prepare s-FeMoOOH/NF. Among them, a carbon counter electrode and a SCE were used as the counter electrode and the reference electrode. And then, FeMoO<sub>2</sub>/NF was placed in 1.0 M KOH solution as the working electrode. Subsequently, electrochemical anodic reconstruction was performed at a constant voltage (0.87 V vs. Hg/HgO) of 2 h to obtain the surface amorphous s-FeMoOOH/NF electrocatalysts.

### **Electrochemical measurements**

The OER activity of samples were tested in CHI 660E electrochemical workstation with a typical three-electrode system. The counter electrode and the reference electrode were Graphite rod and a Hg/HgO electrode, respectively. The equation ( $E_{RHE} = E_{Hg/HgO} + 0.0592pH + 0.098$  V) was applied to the conversion of the applied potentials. LSV curves were performed at a scan rate of 5 mV s<sup>-1</sup> with 100% iR-compensation. The electrochemically active surface areas (ECSA) were calculated from the CV curves at various scan rates. The electrochemical impedance spectroscopy (EIS) were obtained with frequencies ranging from 10<sup>5</sup> Hz to 10<sup>-2</sup> Hz at 10 mA cm<sup>-2</sup>. The stability tests were conducted under a constant voltage. Alkaline seawater was collected by dissolving 28 g of potassium hydroxide in natural seawater in a 500-mL volumetric bottle. During the measurement, high-purity O<sub>2</sub> has been bubbled through the electrolyte to saturate it and fix the reversible oxygen potential. The dimensions of the FeMoOOH/NF electrodes were 0.25 cm<sup>2</sup>. The anion-exchange membrane (FAA-3-50) was purchased from Suzhou Siner Technology Co., Ltd.

The Proton Reaction Order ( $\rho^{\text{RHE}}$ ) represented the dependence of OER reaction kinetics on proton activity and was defined by the following formula:

$$\rho^{\text{RHE}} = \partial \log(j) / \partial \text{pH}$$

In this case, the pH value had ranged from 12.5 to 13.5, and  $\log(j)$  referred to the logarithm of the current density at 1.5 V versus RHE. When proton-coupled electron transfer reactions occurred, the OER kinetics were nearly independent of the pH value of the solution, resulting in a low  $\rho^{\text{RHE}}$ . On the other hand, if non-synergistic proton-electron transfer was involved in the OER, the kinetics would display a strong pH-dependence, leading to a higher  $\rho^{\text{RHE}}$  value.

Regarding the  $^{18}\text{O}$  isotope labeling experiments, both FeMoOOH/NF and MoO<sub>x</sub>/NF had first been activated by the electrochemical CV method (ranging from 0 to 1.8 V versus Hg/HgO, across 10 CV cycles) in an  $^{18}\text{O}$ -labeled KOH electrolyte. They then underwent an OER test (20 mA cm<sup>-2</sup> for 10 minutes) in 1.0 M KOH using regular H<sub>2</sub>O. Following this, the gas was collected for GC-MS analysis.

The efficiency of electro-hydrogen energy conversion ( $\eta_{\text{ETH}}$ ) and the electricity consumption per cubic meter of hydrogen ( $E_{\text{H}_2}$ , kW h Nm<sup>-3</sup>) were calculated using the unit electric quantity per cubic meter of hydrogen ( $Q_u$ , A h Nm<sup>-3</sup>) and cell voltage ( $V$ , V) at an industrially relevant current density of 500 mA cm<sup>-2</sup>, as follows:

$$Q_u = \frac{2N_A e}{3600 \times 22.43 \times 10^{-3}} = 2390 \text{ A h Nm}^{-3}$$

where 1.48 V represents the thermal-neutral voltage for overall water splitting, and  $e$  and  $N_A$  denote the electron charge and Avogadro's number ( $6.022 \times 10^{23} \text{ mol}^{-1}$ ), respectively.

For the Co<sub>2</sub>Mo<sub>3</sub>O<sub>8</sub>/MoO<sub>2</sub>/NF//FeMoOOH/NF electrolyzer,

$$E_{\text{H}_2} = \frac{Q_u V}{1000} = 2390 \times 1.64 \div 1000 = 3.94 \text{ km h Nm}^{-3}$$

$$\eta_{\text{ETH}} = \frac{1.48 \times Q_u}{E_{\text{H}_2} \times 1000} \times 100\% = \frac{1.48 \times 2390}{3.94 \times 1000} \times 100\% = 89.7\%$$

**DFT computations:**

Theoretical calculations were performed via the Vienna ab initio software package (VASP). The computational procedure employed the gradient approximation (GGA) with the Perdew-Burke-Ernzerhof (PBE) parameterization was used to represent the exchange-correlation energies. The phase structure was modeled using a  $3 \times 3 \times 1$  k-point mesh in the Brillouin zone. Computational parameters included an energy cutoff of 300 eV, and convergence thresholds for force and energy were set to  $0.05 \text{ eV} \cdot \text{\AA}^{-1}$  and  $10^{-5} \text{ eV}$ , respectively. The vacuum layer was 15 Å.

**Characterization:**

X-ray diffraction (XRD) was tested on the Bruker D8 focus. Hitachi S-4800 and JEOL JEM 2100 were used to study scanning electron microscope (SEM) and high-resolution transmission electron microscopy (HRTEM), respectively. The energy dispersive X-ray (EDX) element mapping images were studied on the TEM equipped. The X-ray photoelectron spectroscopy (XPS) spectra were tested on ESCALAB 250Xi. The in-situ Raman tests were performed on Renishaw inVia-Qontor using a 532 nm laser excitation. The inductively coupled plasma-mass spectrometry (ICP-MS) were evaluated by Varian 710-OES. In-situ attenuated total reflection infrared (ATR-IR) spectra was performed between 1.2 V to 1.7 V *vs.* RHE.

## Figures

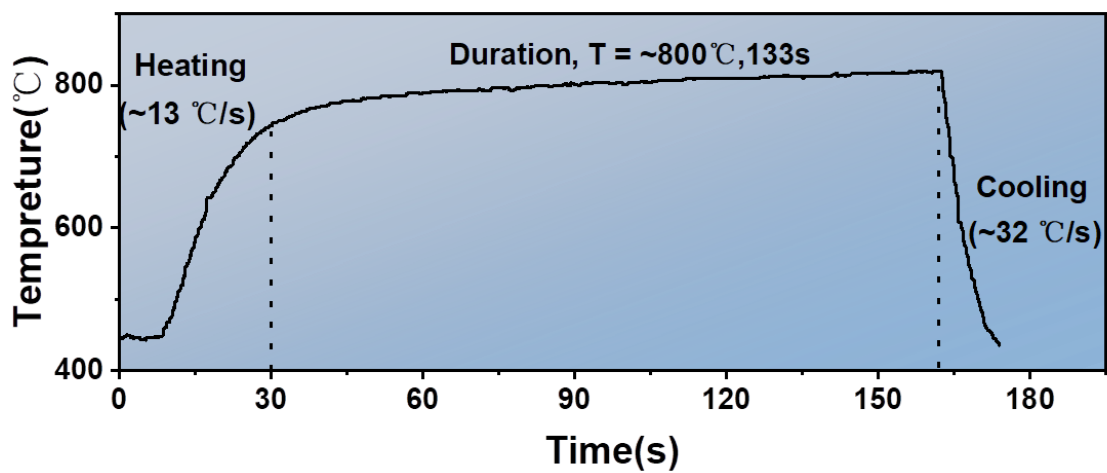

**Fig. S1.** Real time reaction temperature of carbothermal shocking process of MoO<sub>2</sub>/NF.

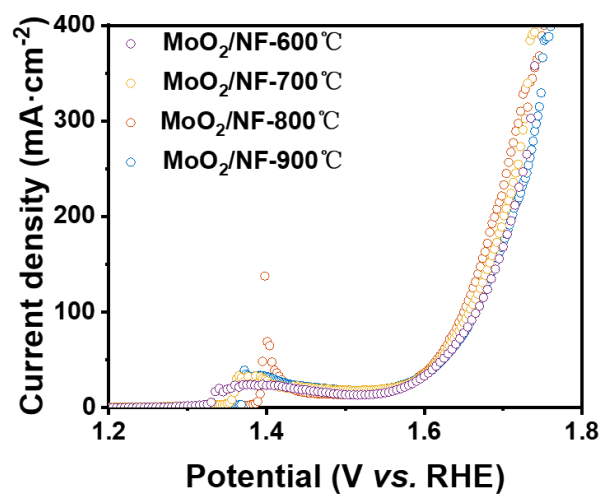

**Fig. S2.** (b) OER polarization curves of MoO<sub>2</sub>/NF at different temperatures.

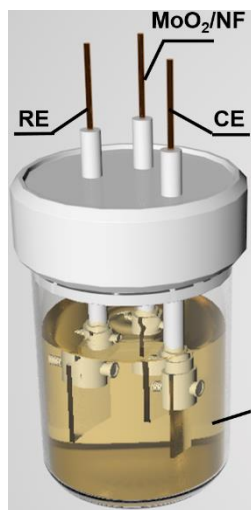

**Fig. S3.** The schematic representation of anodic reconstruction.

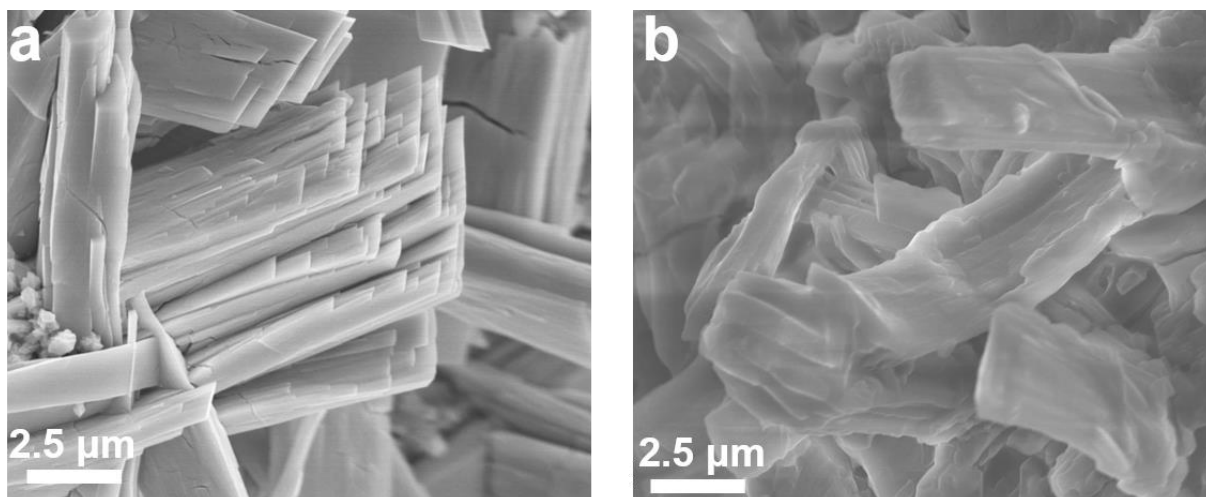

**Fig. S4.** SEM of (a) FeMoOOH/NF-0 h and (b) FeMoOOH/NF-2 h.



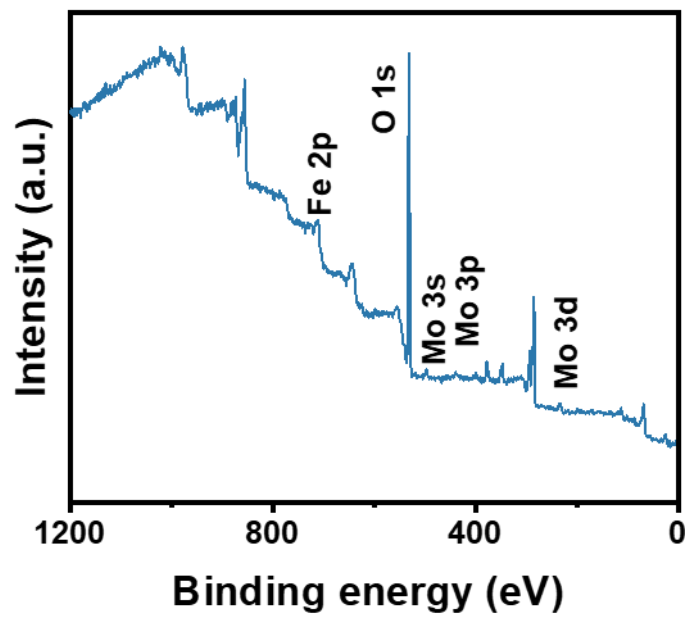

Fig. S5. XPS survey spectrum of FeMoOOH/NF-2h.

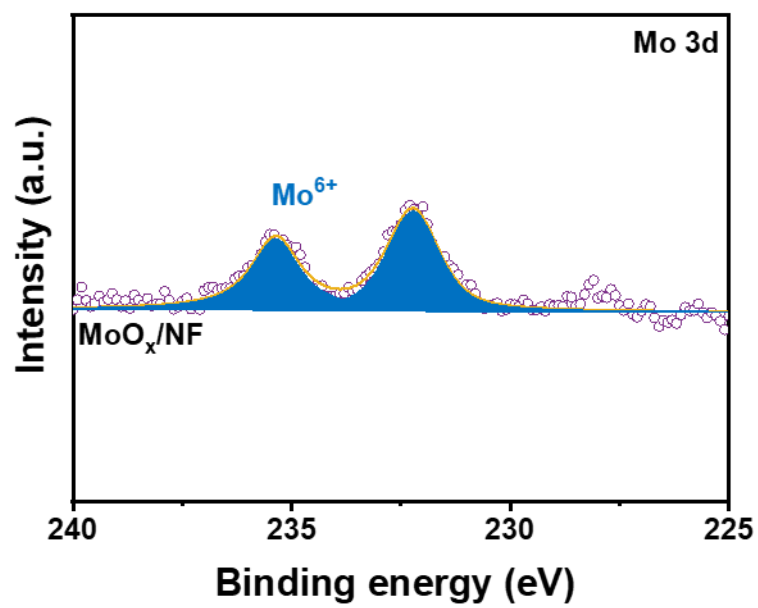

**Fig. S6.** XPS spectrum of Mo 3d in MoO<sub>x</sub>/NF.

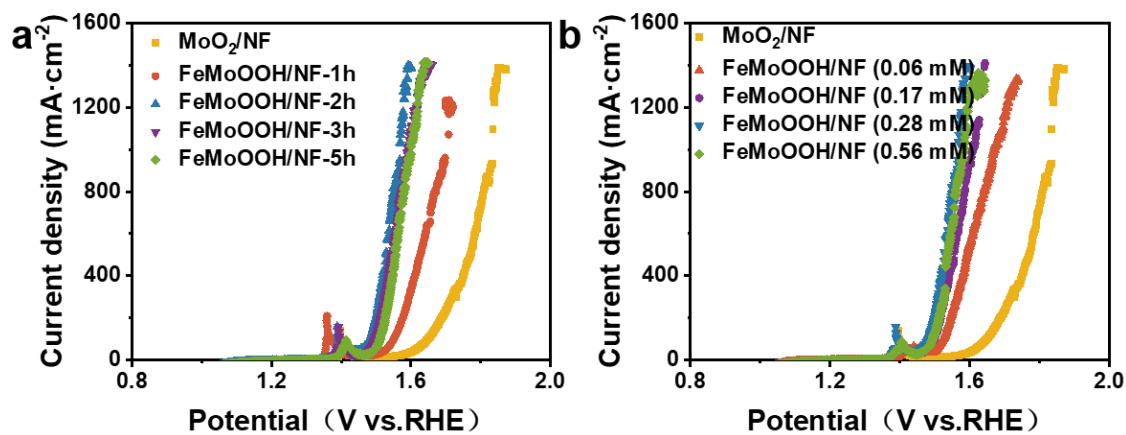

**Fig. S7.** Alkaline solution: (a) OER polarization curves of FeMoOOH/NF for different reconstruction time and (b) OER polarization curves for different electrolyte concentrations containing  $\text{Fe}(\text{NO}_3)_3 \cdot 9\text{H}_2\text{O}$ .

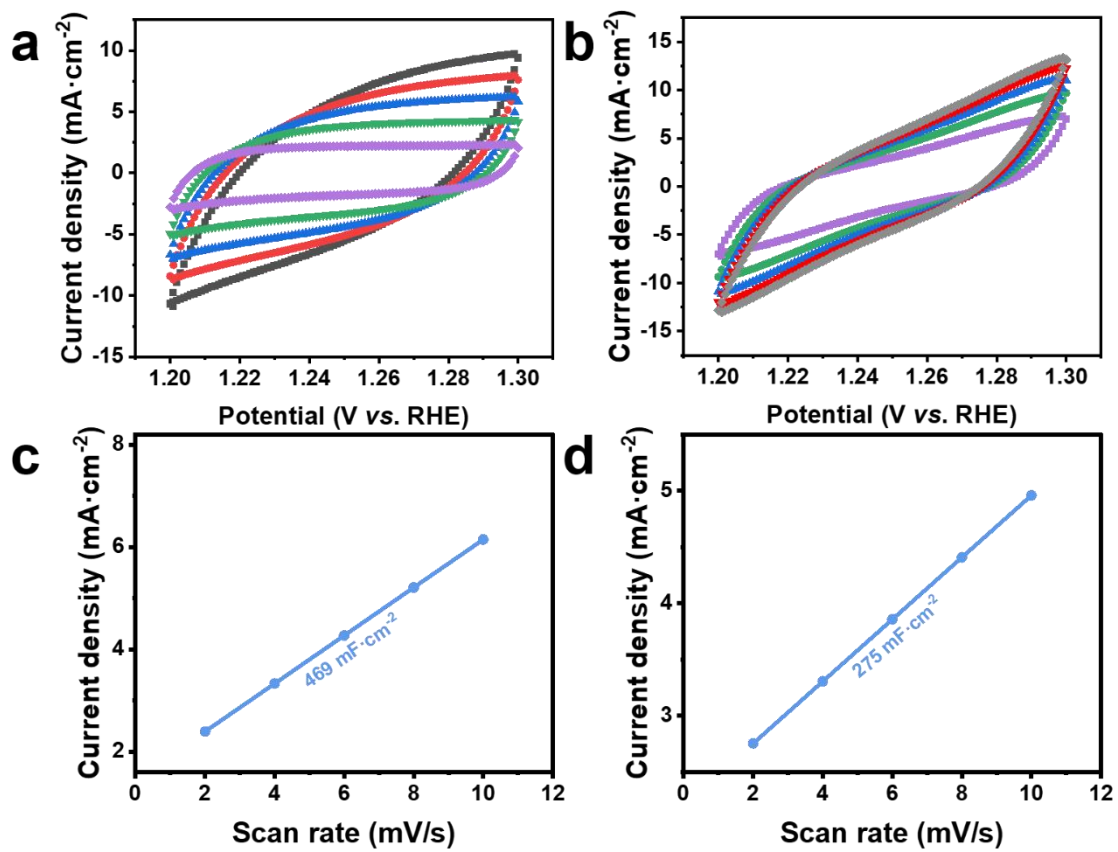

**Fig. S8.** Alkaline solution: CV curves of (a) FeMoOOH/NF and (b) MoO<sub>x</sub>/NF.  $C_{dl}$  of (c) FeMoOOH/NF and (d) MoO<sub>x</sub>/NF.

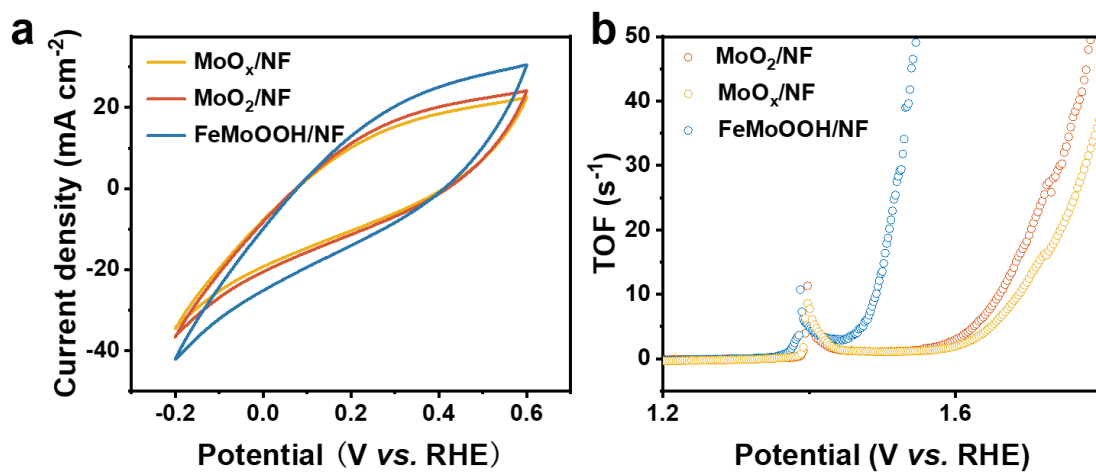

**Fig. S9.** (a) CVs for as-prepared samples in phosphate buffer (pH 7), (b) TOF.

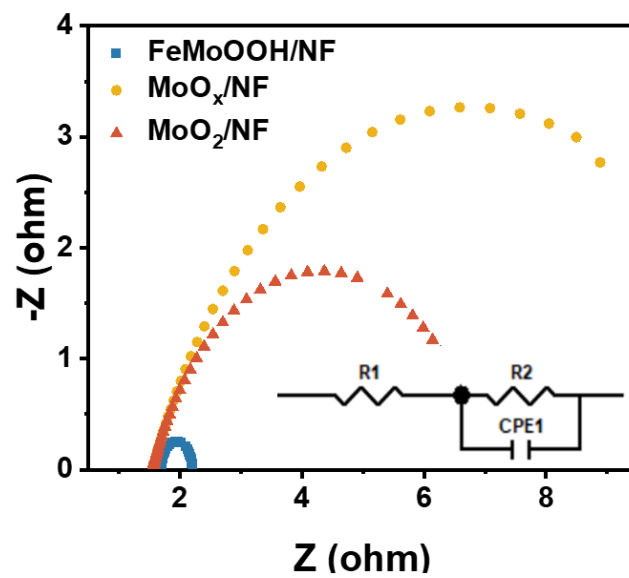

**Fig. S10.** Alkaline solution: EIS of FeMoOOH/NF, MoO<sub>x</sub>/NF and MoO<sub>2</sub>/NF.

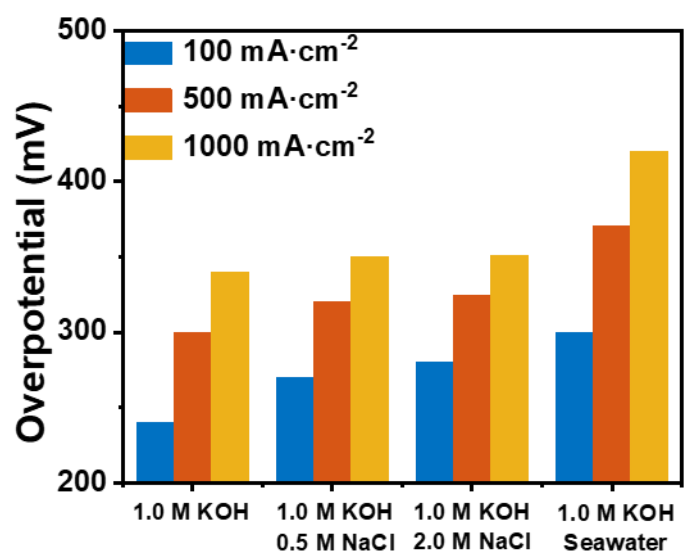

**Fig. S11.** Comparison of overpotential.

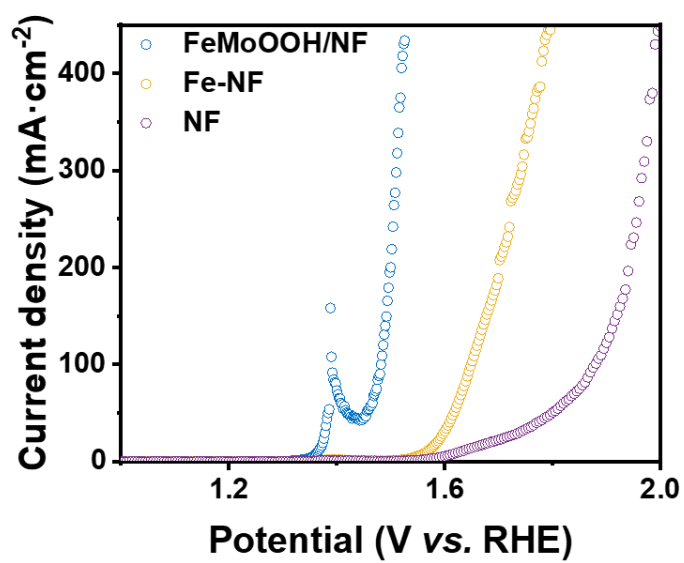

Fig. S12. LSV curves of FeMoOOH/NF, Fe-NF and NF.



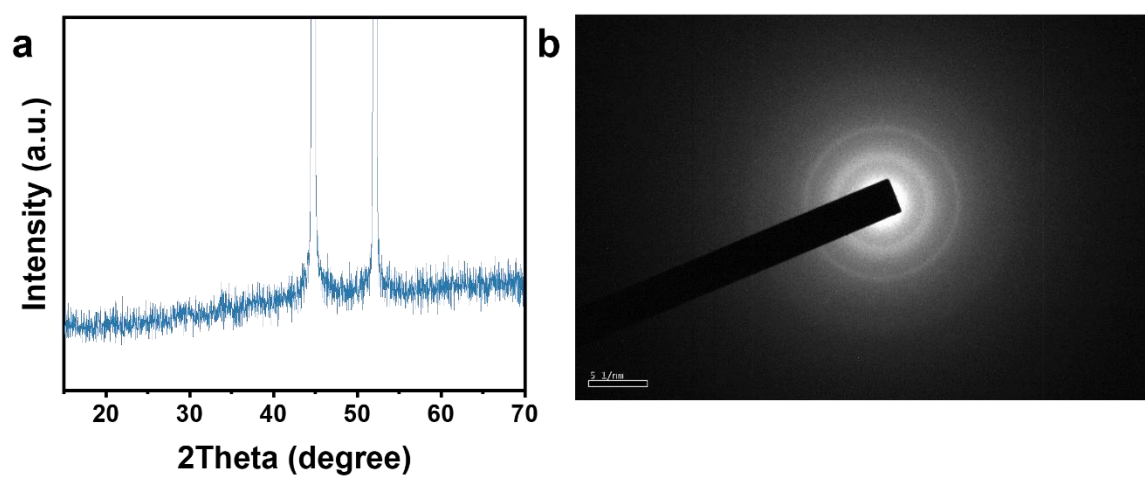

**Fig. S13.** (a) XRD of FeMoOOH/NF and (b) SAED of FeMoOOH/NF after the 100-hour I-t test.

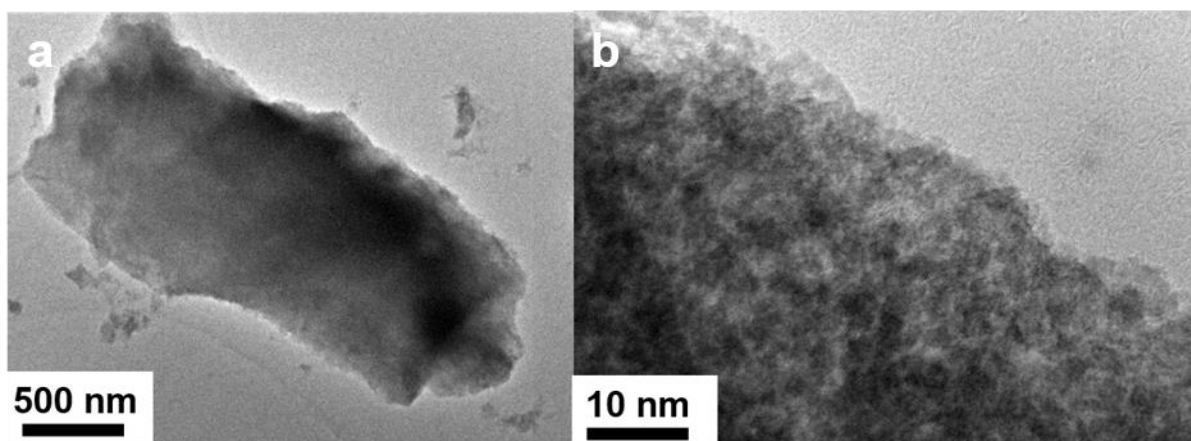

**Fig. S14.** TEM and HRTEM of FeMoOOH/NF after the 100-hour I-t test.

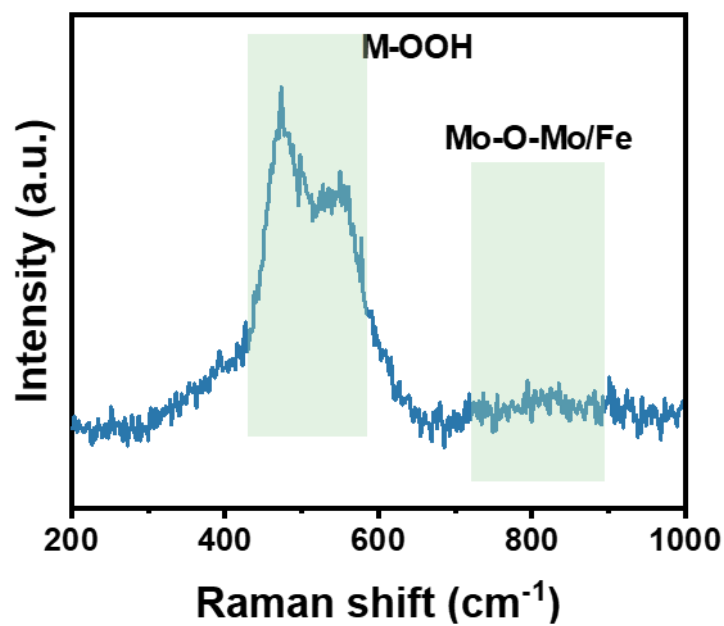

**Fig. S15.** Raman of FeMoOOH/NF after the 100-hour I-t test.

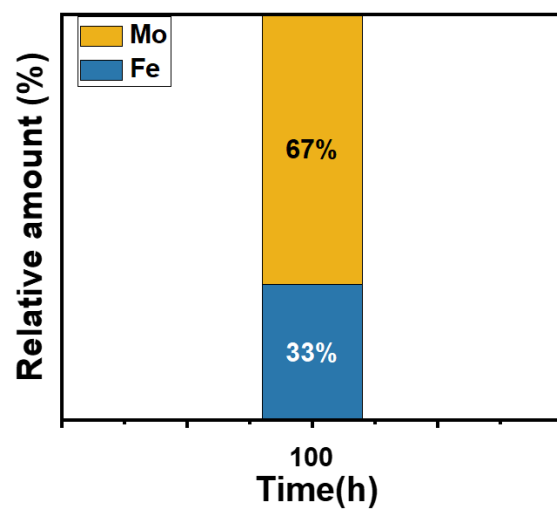

**Fig. S16.** ICP-MS tests of FeMoOOH/NF after the 100-hour I-t test.

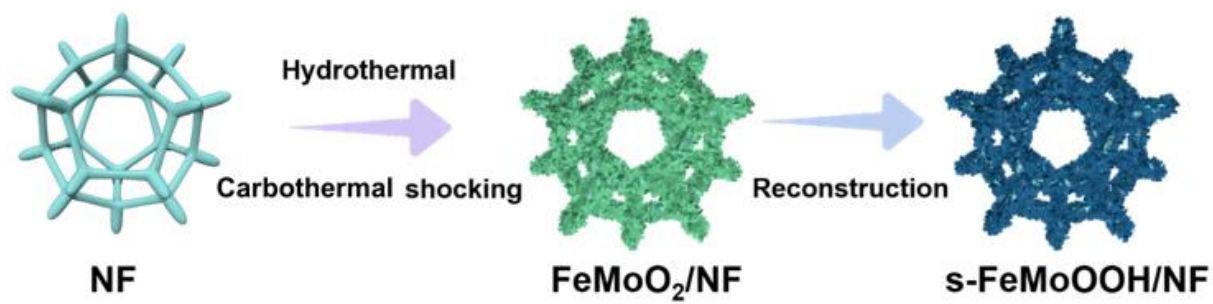

**Fig. S17.** Schematic diagram of the synthesis of surface amorphous FeMoOOH/NF (s-FeMoOOH/NF).

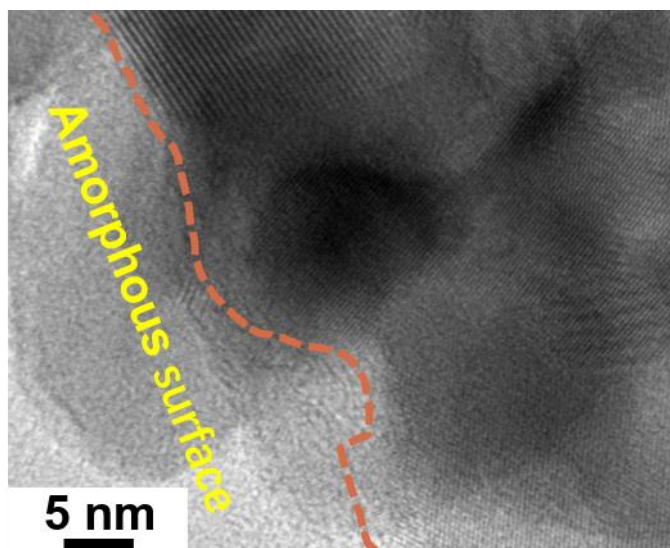

**Fig. S18.** TEM of s-FeMoOOH/NF.

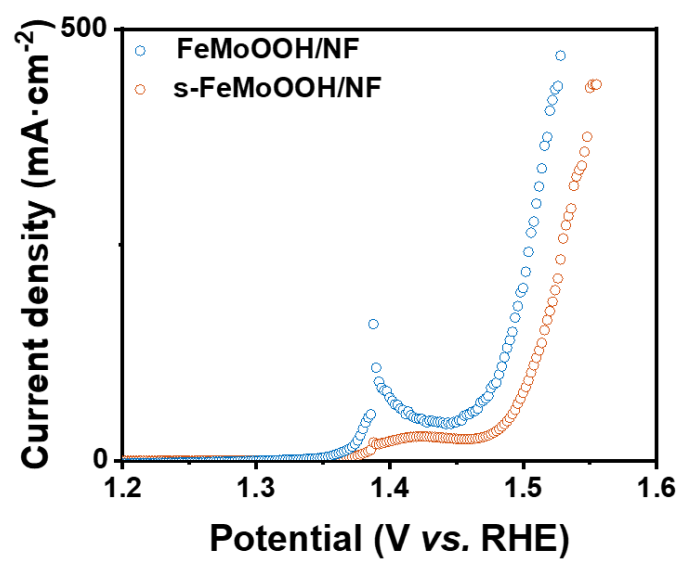

Fig. S19. LSV curves of alkaline solution.

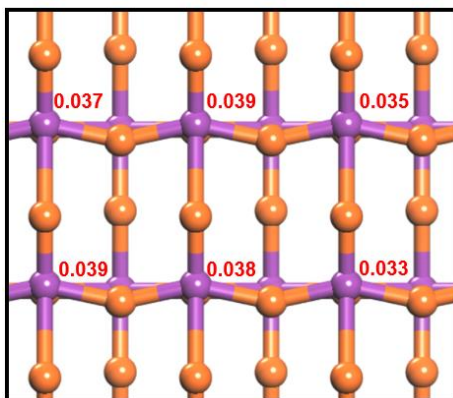

**Fig. S20.** Nucleophilic properties of atoms in MoO<sub>x</sub>.



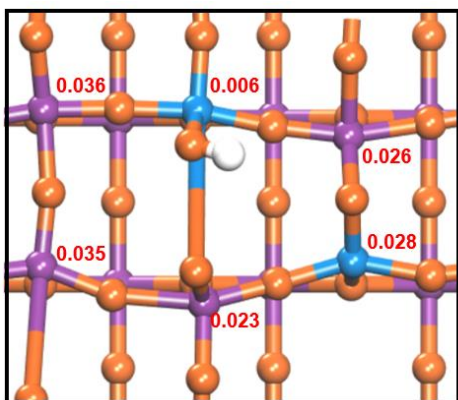

**Fig. S21.** Nucleophilic properties of atoms in FeMoOOH.

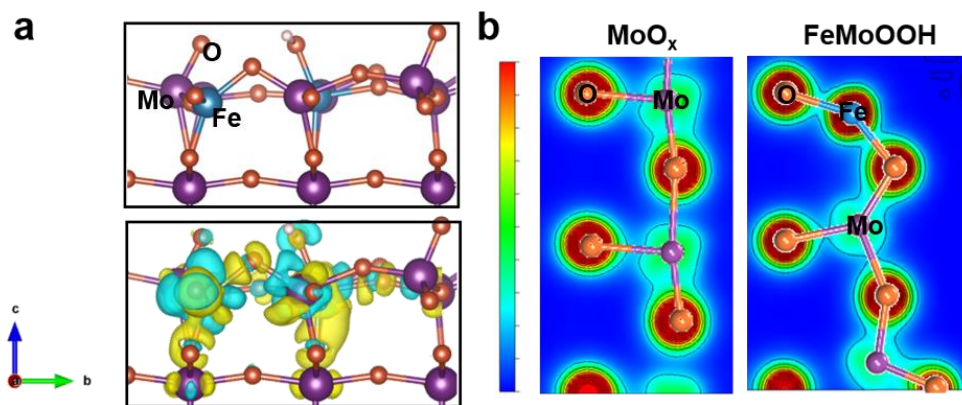

**Fig. S22.** Charge density difference plots.

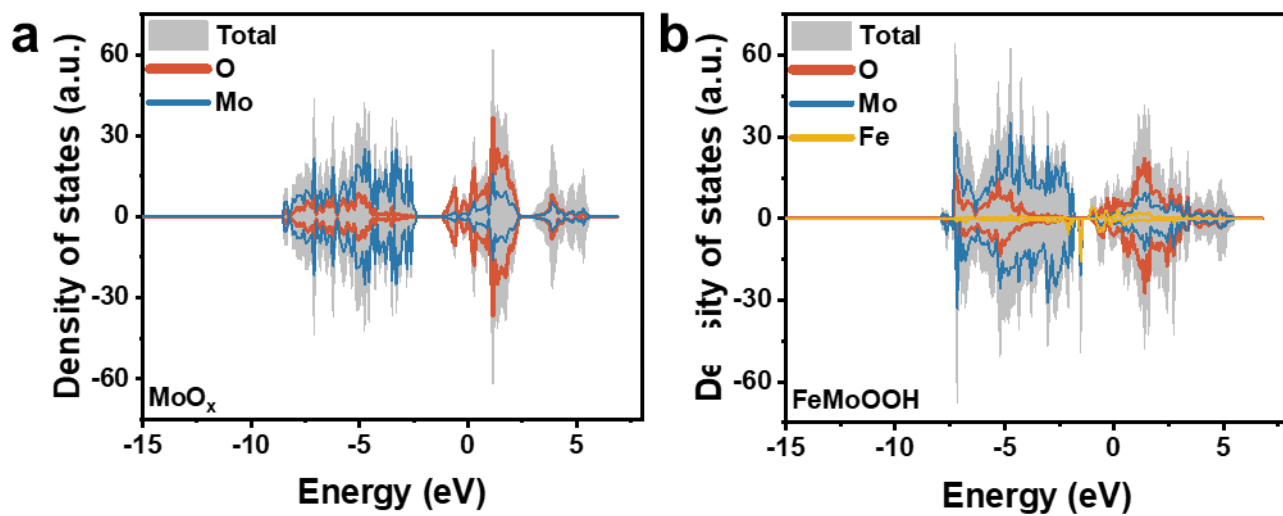

Fig. S23. DOS of (a) MoO<sub>x</sub> and (b) FeMoOOH.

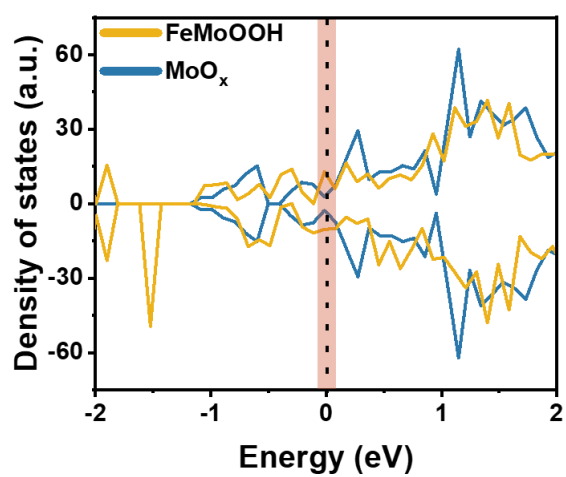

**Fig. S24.** TDOS of (a)  $\text{MoO}_x$  and (b)  $\text{FeMoOOH}$ .

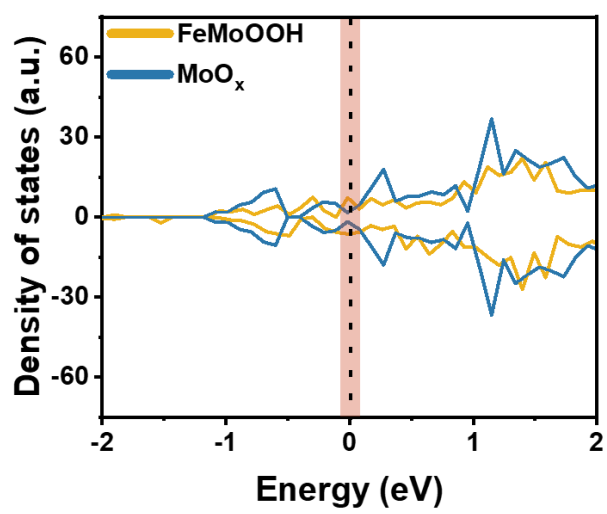

Fig. S25. p-band centers of MoO<sub>x</sub> and FeMoOOH.

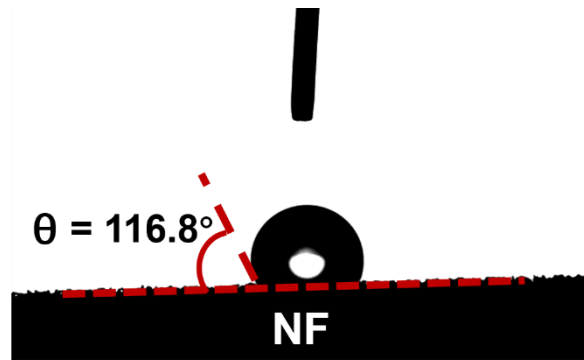

**Fig. S26.** Water droplets contact angle at NF.

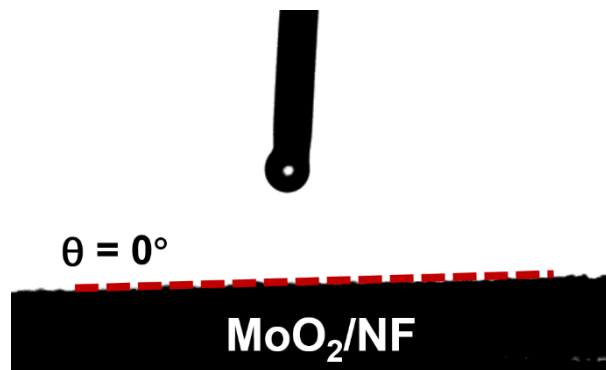

**Fig. S27.** Water droplets contact angle at MoO<sub>2</sub>/NF.

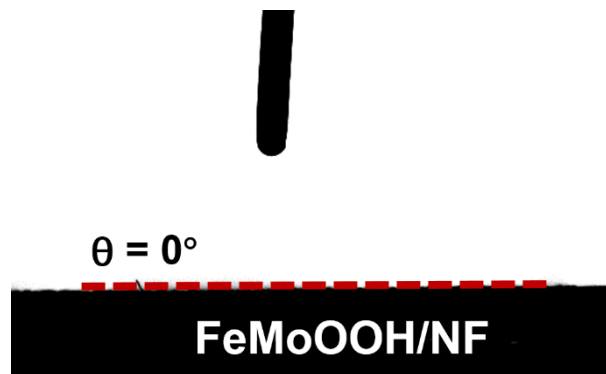

**Fig. S28.** Water droplets contact angle at FeMoOOH/NF.

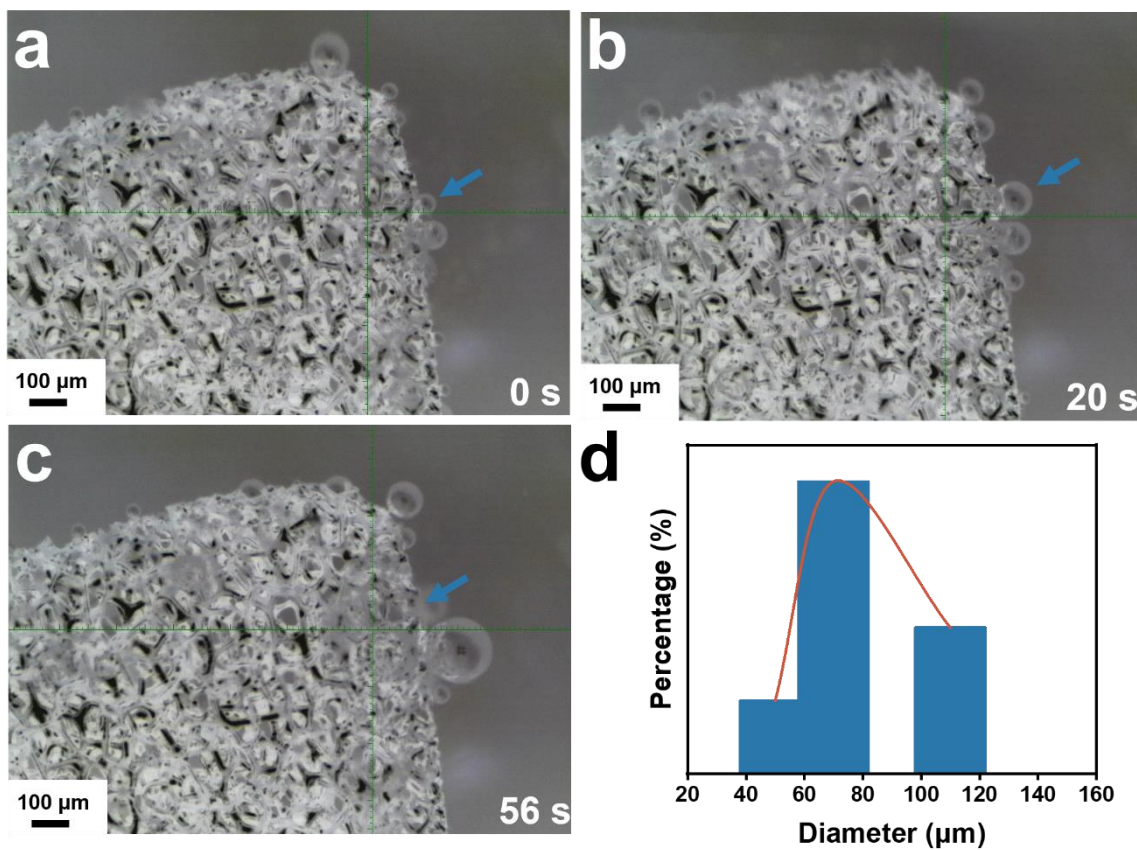

**Fig. S29.** Digital images showing the bubble generation behavior and the corresponding statistics of size distribution of releasing bubbles: (a-d) NF.

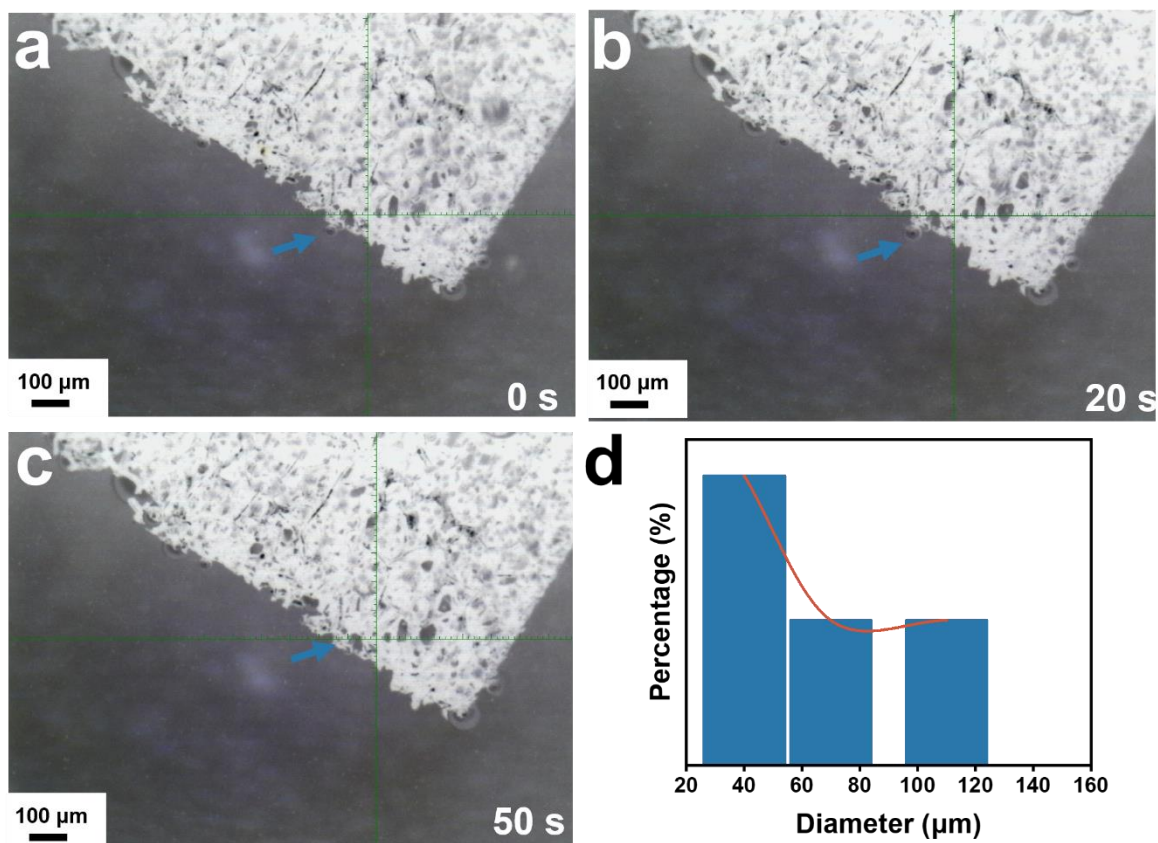

**Fig. S30.** Digital images showing the bubble generation behavior and the corresponding statistics of size distribution of releasing bubbles: (a-d) MoO<sub>2</sub>/NF.



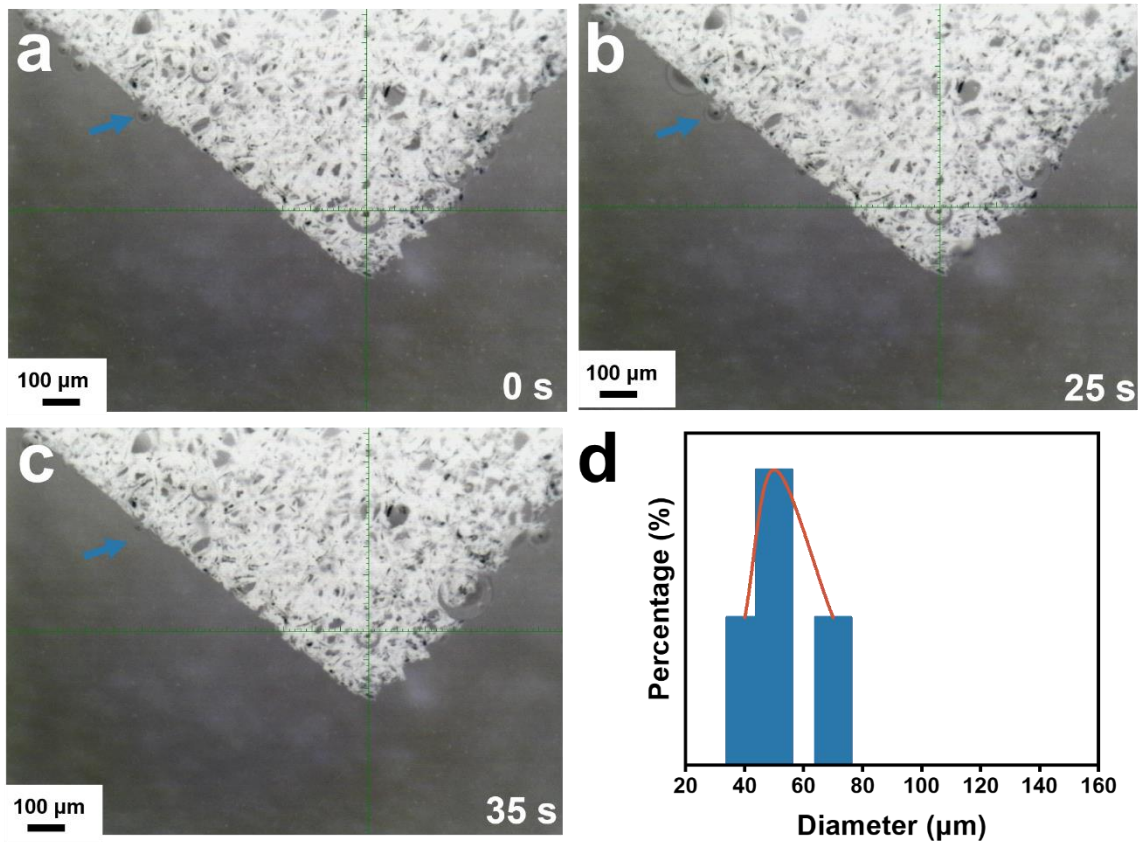

**Fig. S31.** Digital images showing the bubble generation behavior and the corresponding statistics of size distribution of releasing bubbles: (a-d) FeMoOOH/NF.

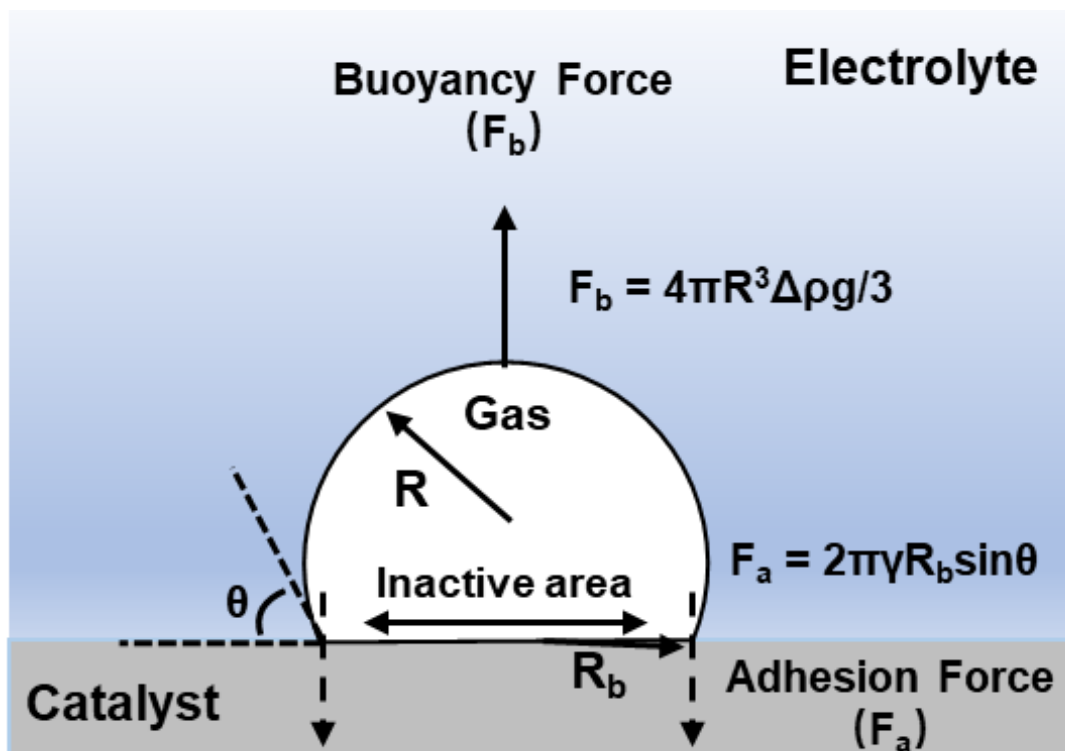

**Fig. S32.** The scheme for a mechanism of bubble-detachment.

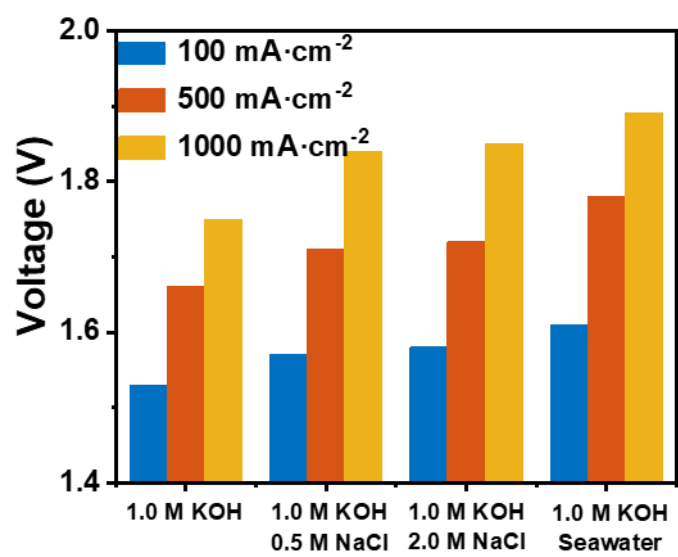

Fig. S33. Comparison of overpotential.

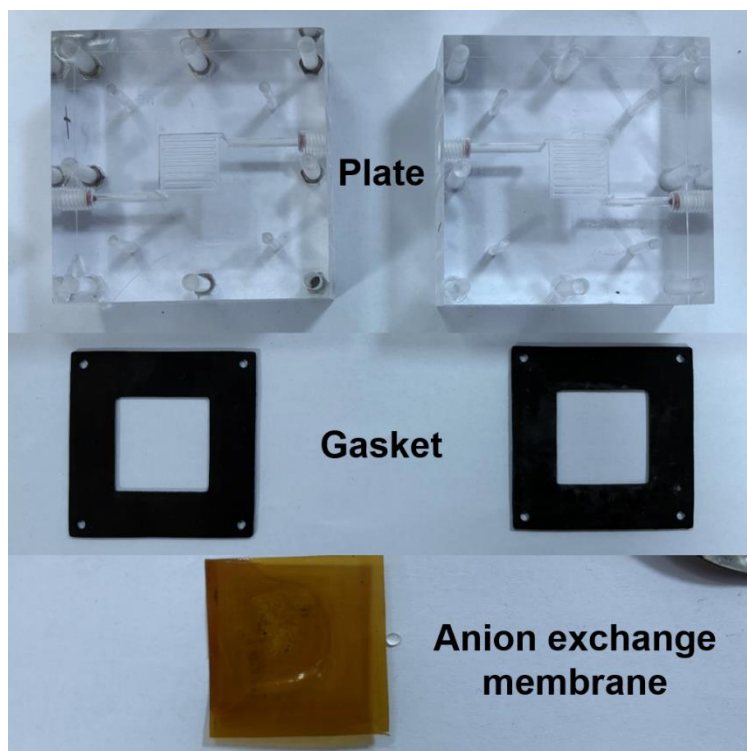

**Fig. S34.** Optical picture of AEM.

## Tables

**Table S1.** OER performance of recently reported catalysts in 1 M KOH.

| Catalysts                                                    | Electrolyte    | $\eta_{10}$<br>(mV) | $\eta_{100}$<br>(mV) | Reference                                           |
|--------------------------------------------------------------|----------------|---------------------|----------------------|-----------------------------------------------------|
| <b>FeMoOOH/NF</b>                                            | <b>1 M KOH</b> | -                   | <b>240</b>           | <b><i>This work</i></b>                             |
| Ru SAs-MoO <sub>3-x</sub> /NF                                | 1 M KOH        | -                   | 282                  | <i>Adv. Sci.</i> 2023, 10, 2300342                  |
| Ir <sub>1</sub> /Ni LDH-T                                    | 1 M KOH        | 228                 | -                    | <i>Nat. Commun.</i> 2024, 15, 559                   |
| LQNMP-Co <sub>2</sub> O <sub>3</sub>                         | 1 M KOH        | 266                 | -                    | <i>ACS Nano</i> 2024,<br>10.1021/acsnano.3c11199    |
| Fe-Ni-CoOOH-TPA                                              | 1 M KOH        | 236                 | -                    | <i>ACS Catal.</i> 2024, 14, 1553–1566               |
| Co@Mo <sub>2</sub> CT <sub>x</sub>                           | 1 M KOH        | 390                 | -                    | <i>Appl. Catal. B Environ.</i> 346,<br>2024, 123731 |
| NiV <sub>0.1</sub> -<br>BLDH/NiCoP/NF                        | 1 M KOH        | -                   | 268                  | <i>Adv. Funct. Mater.</i> 2024, 2315949             |
| V-Co <sub>2</sub> P <sub>4</sub> O <sub>12</sub> /CC         | 1 M KOH        | 316                 | -                    | <i>Adv. Funct. Mater.</i> 2024, 2313974             |
| 10.6 wt % Co SAC                                             | 1 M KOH        | 351                 | -                    | <i>J. Am. Chem. Soc.</i> 2023, 145,<br>8052–8063    |
| NiMoO <sub>4</sub>                                           | 1 M KOH        | 260                 | -                    | <i>Nano-Micro Lett.</i> 2023, 15, 30                |
| Li- $\alpha$ -MoO <sub>3</sub> /CFP                          | 1 M KOH        | 458                 | -                    | <i>ACS Materials Lett.</i> 2023, 5,<br>1196–1201    |
| FeCoPBA-VCN                                                  | 1 M KOH        | 218                 | -                    | <i>Adv. Energy Mater.</i> 2023,<br>2302403          |
| CoO/Co <sub>3</sub> O <sub>4</sub> /Ti                       | 1 M KOH        | 270                 | -                    | <i>Angew. Chem. Int. Ed.</i> 2020,<br>59,6929–6935  |
| CoO/Co <sub>3</sub> O <sub>4</sub> /CC                       | 1 M KOH        | 260                 | -                    | <i>Angew. Chem. Int. Ed.</i> 2020,<br>59,6929–6935  |
| V <sub>O</sub> -<br>CoMoO <sub>4</sub> @Cu <sub>2</sub> S/CF | 1 M KOH        | 181                 | 320                  | <i>Chem. Eng. J.</i> 477, 2023, 147016              |
| Ru@RuO <sub>x</sub> /NCN                                     | 1 M KOH        | 270                 | -                    | <i>J. Energy Chem.</i> 2023, 87, 286-<br>294        |
| FeOOH/Ni <sub>3</sub> S <sub>2</sub> /NF                     | 1 M KOH        | -                   | 268                  | <i>Small</i> 2023, 2309371                          |

|                                                                    |         |     |     |                                                        |
|--------------------------------------------------------------------|---------|-----|-----|--------------------------------------------------------|
| Co <sub>3</sub> Mo/Mo <sub>2</sub> C@NC                            | 1 M KOH | 282 | 355 | <i>Adv. Funct. Mater.</i> 2024, 2314247                |
| MoS <sub>2</sub> @Co                                               | 1 M KOH | 370 | -   | <i>Energy Environ. Mater.</i> 2024, 0,<br>e12702       |
| NiCo <sub>2</sub> O <sub>4</sub> @CeO <sub>2</sub>                 | 1 M KOH | 228 | -   | <i>Chem. Eng. J.</i> 482, 2024, 148787                 |
| Ni <sub>3</sub> S <sub>2</sub> /Fe <sub>3</sub> O <sub>4</sub> /NF | 1 M KOH | 220 | -   | <i>J. Colloid Interface Sci.</i> 2024,<br>660, 440-448 |

**Table S2.** OER performance of recently reported catalysts in 1 M KOH Seawater.

| Catalysts                                                            | Electrolyte                 | $\eta_{10}$<br>(mV) | $\eta_{100}$<br>(mV)   | Reference                                                 |
|----------------------------------------------------------------------|-----------------------------|---------------------|------------------------|-----------------------------------------------------------|
| <b>FeMoOOH/NF</b>                                                    | <b>1 M KOH<br/>Seawater</b> | -                   | <b>300</b>             | <b><i>This work</i></b>                                   |
| Co <sub>2</sub> Mo <sub>3</sub> O <sub>8</sub> /MoO <sub>2</sub> /NF | 1 M KOH<br>Seawater         | -                   | 320<br>( $\eta_{40}$ ) | <i>Appl. Catal. B Environ.</i> 338,<br>2023, 123015       |
| FeMoNi/NF                                                            | 1 M KOH<br>Seawater         | -                   | ~310                   | <i>Appl. Catal. B Environ.</i> 340,<br>2024, 123277       |
| (NiFeCoV)S <sub>2</sub>                                              | 1 M KOH<br>Seawater         | -                   | 299                    | <i>J. Colloid Interface Sci.</i> 2023,<br>645, 724–734.   |
| Ni <sub>2</sub> P-Fe <sub>2</sub> P/NF                               | 1 M KOH<br>Seawater         | 240                 | 305                    | <i>Adv. Funct. Mater.</i> 2021, 31,<br>2006484.           |
| Fe-MoO <sub>2</sub> /NF                                              | 1 M KOH<br>Seawater         | -                   | 340                    | <i>Mater. Horiz.</i> , 2024,<br>10.1039/D3MH01757E        |
| CoSe/MoSe <sub>2</sub>                                               | 1 M KOH<br>Seawater         | 350                 | -                      | <i>ACS Sustain. Chem. Eng.</i> 2022,<br>10, 30, 9980–9990 |
| NiTe@FeOOH                                                           | 1 M KOH<br>Seawater         | -                   | 280                    | <i>Chem. Eng. J.</i> 2023, 474,<br>145568-145575          |

**Table S3.** OWS performance of recently reported catalysts in alkaline water.

| Catalysts                                                                                                        | Electrolyte    | $\eta_{100}$<br>(V)      | $\eta_{1000}$<br>(V)     | Reference                                           |
|------------------------------------------------------------------------------------------------------------------|----------------|--------------------------|--------------------------|-----------------------------------------------------|
| <b>Co<sub>2</sub>Mo<sub>3</sub>O<sub>8</sub>/MoO<sub>2</sub>/NF //<br/>FeMoOOH/NF</b>                            | <b>1 M KOH</b> | <b>1.53</b>              | <b>1.75</b>              | <b><i>This work</i></b>                             |
| R-CoC <sub>2</sub> O <sub>4</sub> @Mxene // R-<br>CoC <sub>2</sub> O <sub>4</sub> @MXene                         | 1 M KOH        | ~1.61<br>( $\eta_{80}$ ) | -                        | <i>Nat. Commun.</i> 2022, 13,<br>5785               |
| Fe-Ni <sub>2</sub> Pv  Fe-Ni <sub>2</sub> Pv                                                                     | 1 M KOH        | -                        | 1.86                     | <i>Adv. Mater.</i> 2024, 36,<br>2307395             |
| V-Co <sub>2</sub> P <sub>4</sub> O <sub>12</sub> /CC // V-<br>Co <sub>2</sub> P <sub>4</sub> O <sub>12</sub> /CC | 1 M KOH        | 1.60<br>( $\eta_{10}$ )  | -                        | <i>Adv. Funct. Mater.</i> 2024,<br>2313974          |
| FMCO/NF // FMCO/NF                                                                                               | 1 M KOH        | ~1.65<br>( $\eta_{40}$ ) | -                        | <i>Appl. Catal. B Environ.</i><br>2023, 328, 122488 |
| CoFe-Ni <sub>2</sub> P// CoFe-Ni <sub>2</sub> P                                                                  | 1 M KOH        | 1.73                     | 1.84<br>( $\eta_{500}$ ) | <i>Adv. Energy Mater.</i> 2023,<br>2301475          |
| Fe-P-CMO// Fe-P-CMO                                                                                              | 1 M KOH        | 1.59                     | -                        | <i>Appl. Catal. B Environ.</i><br>2024, 346, 123741 |
| Ru SAs-MoO <sub>3-x</sub> /NF // Ru SAs-<br>MoO <sub>3-x</sub> /NF                                               | 1 M KOH        | 1.71                     | -                        | <i>Adv. Sci.</i> 2023, 10,<br>2300342               |



**Table S4.** OWS performance of recently reported catalysts in alkaline seawater.

| Catalysts                                                                                                                                    | Electrolyte             | $\eta_{100}$<br>(V)   | $\eta_{1000}$<br>(V)  | Reference                                        |
|----------------------------------------------------------------------------------------------------------------------------------------------|-------------------------|-----------------------|-----------------------|--------------------------------------------------|
| <b>Co<sub>2</sub>Mo<sub>3</sub>O<sub>8</sub>/MoO<sub>2</sub>/NF/NF // FeMoOOH/NF</b>                                                         | <b>1 M KOH Seawater</b> | <b>1.61</b>           | <b>1.89</b>           | <b><i>This work</i></b>                          |
| R-CoC <sub>2</sub> O <sub>4</sub> @Mxene // R-CoC <sub>2</sub> O <sub>4</sub> @MXene                                                         | 1 M KOH Seawater        | ~1.70 ( $\eta_{80}$ ) | -                     | <i>Nat. Commun.</i> 2022, 13, 5785               |
| CoFe-Ni <sub>2</sub> P // CoFe-Ni <sub>2</sub> P                                                                                             | 1 M KOH Seawater        | 1.74                  | 1.89 ( $\eta_{500}$ ) | <i>Adv. Energy Mater.</i> 2023, 2301475          |
| Ru SAs-MoO <sub>3-x</sub> /NF // Ru SAs-MoO <sub>3-x</sub> /NF                                                                               | 1 M KOH Seawater        | 1.76                  | -                     | <i>Adv. Sci.</i> 2023, 10, 2300342               |
| MoO <sub>x</sub> /Co(OH) <sub>2</sub> /NF // NiFe-LDH/NF                                                                                     | 1 M KOH Seawater        | 1.74                  | -                     | <i>Nano Energy</i> 2024, 121, 109246             |
| FeMoNi/NF // FeMoNi/NF                                                                                                                       | 1 M KOH Seawater        | ~1.68                 | -                     | <i>Appl. Catal. B Environ.</i> 2024, 340, 123277 |
| Mo-Ru/CNTs//RuO <sub>2</sub>                                                                                                                 | 1 M KOH Seawater        | 1.54 ( $\eta_{40}$ )  | -                     | <i>J. Mater. Chem. A</i> , 2023,11, 22430-22440  |
| Co <sub>2</sub> Mo <sub>3</sub> O <sub>8</sub> /MoO <sub>2</sub> /NF // Co <sub>2</sub> Mo <sub>3</sub> O <sub>8</sub> /MoO <sub>2</sub> /NF | 1 M KOH Seawater        | ~1.76                 | -                     | <i>Appl. Catal. B Environ.</i> 2024, 338, 123015 |
| Pt <sub>2</sub> /Ni(OH) <sub>2</sub> /NF // RuO <sub>2</sub> /NF                                                                             | 1 M KOH Seawater        | 1.80                  | -                     | <i>Appl. Catal. B Environ.</i> 2023, 331, 122703 |

**Table S5.** Solar-to-hydrogen (STH) conversion efficiency with different reported solar cell.

| Catalysts                                                                                | Solar cell                                                                                        | STH efficiency | Reference                                               |
|------------------------------------------------------------------------------------------|---------------------------------------------------------------------------------------------------|----------------|---------------------------------------------------------|
| Co <sub>2</sub> Mo <sub>3</sub> O <sub>8</sub> /Mo<br>O <sub>2</sub> /NF//FeMo<br>OOH/NF | Perovskite solar cell                                                                             | 14.3           | <i>This work</i>                                        |
|                                                                                          | Triple-junction solar cell<br>(GaInP <sub>2</sub> /InGaAs/Ge)                                     | ~18.3          | <i>Nat. Sustain. 2024,</i><br><i>7,158-167</i>          |
|                                                                                          | Commercial GaAs solar<br>cell                                                                     | ~19.6          | <i>Carbon Energy, 2023,</i><br><i>e217</i>              |
|                                                                                          | Perovskite single-<br>junction device stack<br>glass/ITO/NiO <sub>x</sub> /perovskit<br>e/C60/Au, | ~21.3          | <i>J. Mater. Chem. A,</i><br><i>2021,9, 14085-14092</i> |

**Table S6.** Comparison between Co<sub>2</sub>Mo<sub>3</sub>O<sub>8</sub>/MoO<sub>2</sub>/NF//FeMoOOH/NF and other reported electrolyzers of unit electricity consumption per cubic meter hydrogen (E<sub>H<sub>2</sub></sub>) and electricity-to-hydrogen energy conversion efficiency (η<sub>ETH</sub>).

| Electrolyser                                                                                           | E <sub>H<sub>2</sub></sub><br>(kW h m <sup>-3</sup> ) | η <sub>ETH</sub><br>(%) | Reference                                              |
|--------------------------------------------------------------------------------------------------------|-------------------------------------------------------|-------------------------|--------------------------------------------------------|
| <b>Co<sub>2</sub>Mo<sub>3</sub>O<sub>8</sub>/MoO<sub>2</sub>/NF//FeMoOOH/NF<br/>(1 M KOH Seawater)</b> | <b>4.04</b>                                           | <b>87.6</b>             | <b><i>This work</i></b>                                |
| <b>Co<sub>2</sub>Mo<sub>3</sub>O<sub>8</sub>/MoO<sub>2</sub>/NF//FeMoOOH/NF<br/>(1 M KOH)</b>          | <b>3.94</b>                                           | <b>89.7</b>             | <b><i>This work</i></b>                                |
| NMFSOH                                                                                                 | 3.99                                                  | 88.7                    | <i>Adv. Energy Mater.</i> 2023,<br>13, 2301222         |
| Fe (FeNiMo) <sub>2</sub> /NF                                                                           | 3.97                                                  | 89.1                    | <i>Small</i> , 2024, 20, 2404786                       |
| NiFe LDH  NiFe LDH                                                                                     | 4.49                                                  | 78.8                    | <i>Small</i> , 2022, 18, e2104354                      |
| NiFe LDH-PMo  NiFe LDH-PMo                                                                             | 4.44                                                  | 79.2                    | <i>Adv Mater</i> , 2022, 34,<br>e2110696               |
| NiFe  NiFe                                                                                             | 4.06                                                  | 88.1                    | <i>Energ. Environ. Sci.</i> , 2020,<br>13, 86-95.      |
| NiMoO/NiMoS  NiMoO/NiMoS                                                                               | 4.21                                                  | 84.0                    | <i>Nat Commun</i> , 2020, 11,<br>5462-5474             |
| CoMoS  CoMoS                                                                                           | 4.52                                                  | 78.2                    | <i>Angew. Chem. Int. Ed.</i> ,<br>2020, 59, 1659-1665. |
| NiFeMoO  NiFeMoO                                                                                       | 6.28                                                  | 56.3                    | <i>Adv Sci</i> , 2020, 7, 1902034.                     |

**Table S7.** Price of the scaling-up prepared FeMoOOH/NF catalyst.

| <b>Material</b>                                                                    | <b>Suppliers</b>                                       | <b>Price<br/>(US\$ kg<sup>-1</sup>)</b> | <b>Component<br/>price in<br/>catalyst<br/>(US\$ m<sup>-2</sup>)</b> | <b>Total price<br/>of catalyst<br/>(US\$ m<sup>-2</sup>)</b> |
|------------------------------------------------------------------------------------|--------------------------------------------------------|-----------------------------------------|----------------------------------------------------------------------|--------------------------------------------------------------|
| (NH <sub>4</sub> ) <sub>6</sub> Mo <sub>7</sub> O <sub>24</sub> ·4H <sub>2</sub> O | Shanghai Aladdin<br>Biochemical<br>Technology Co., Ltd | 80.8                                    | 37.0                                                                 |                                                              |
| Fe(NO <sub>3</sub> ) <sub>3</sub><br>·6H <sub>2</sub> O                            | Shanghai Aladdin<br>Biochemical<br>Technology Co., Ltd | 47.5                                    | 17.2                                                                 | 84.2                                                         |
| Ni foam                                                                            | Kunshan<br>Guangjiayuan<br>Technology Co., Ltd         | -                                       | ~30                                                                  |                                                              |

**Table S8.** Price of the scaling-up prepared FeMoOOH/NF.

| <b>Catalysts</b>  | <b>Support</b> | <b>Suppliers</b>                   | <b>Price per 1 m<sup>2</sup> catalyst (US\$ m<sup>-2</sup>)</b> |
|-------------------|----------------|------------------------------------|-----------------------------------------------------------------|
| <b>FeMoOOH/NF</b> | Ni foam        | <b>This work</b>                   | 84.27                                                           |
| <b>Raney Ni</b>   | Ni foam        | Jiangsu Leini Metal Tech. Co., Ltd | 60                                                              |
| <b>Pt black</b>   | Carbon cloth   | Fuel Cell store                    | 9100                                                            |
